# Supplementary figures and images for: The Genome Response to Artificial Selection: A Case Study in Dairy Cattle
Source: PLOS journal article supplement (doi:10.1371/journal.pone.0006595), 2009-08-11

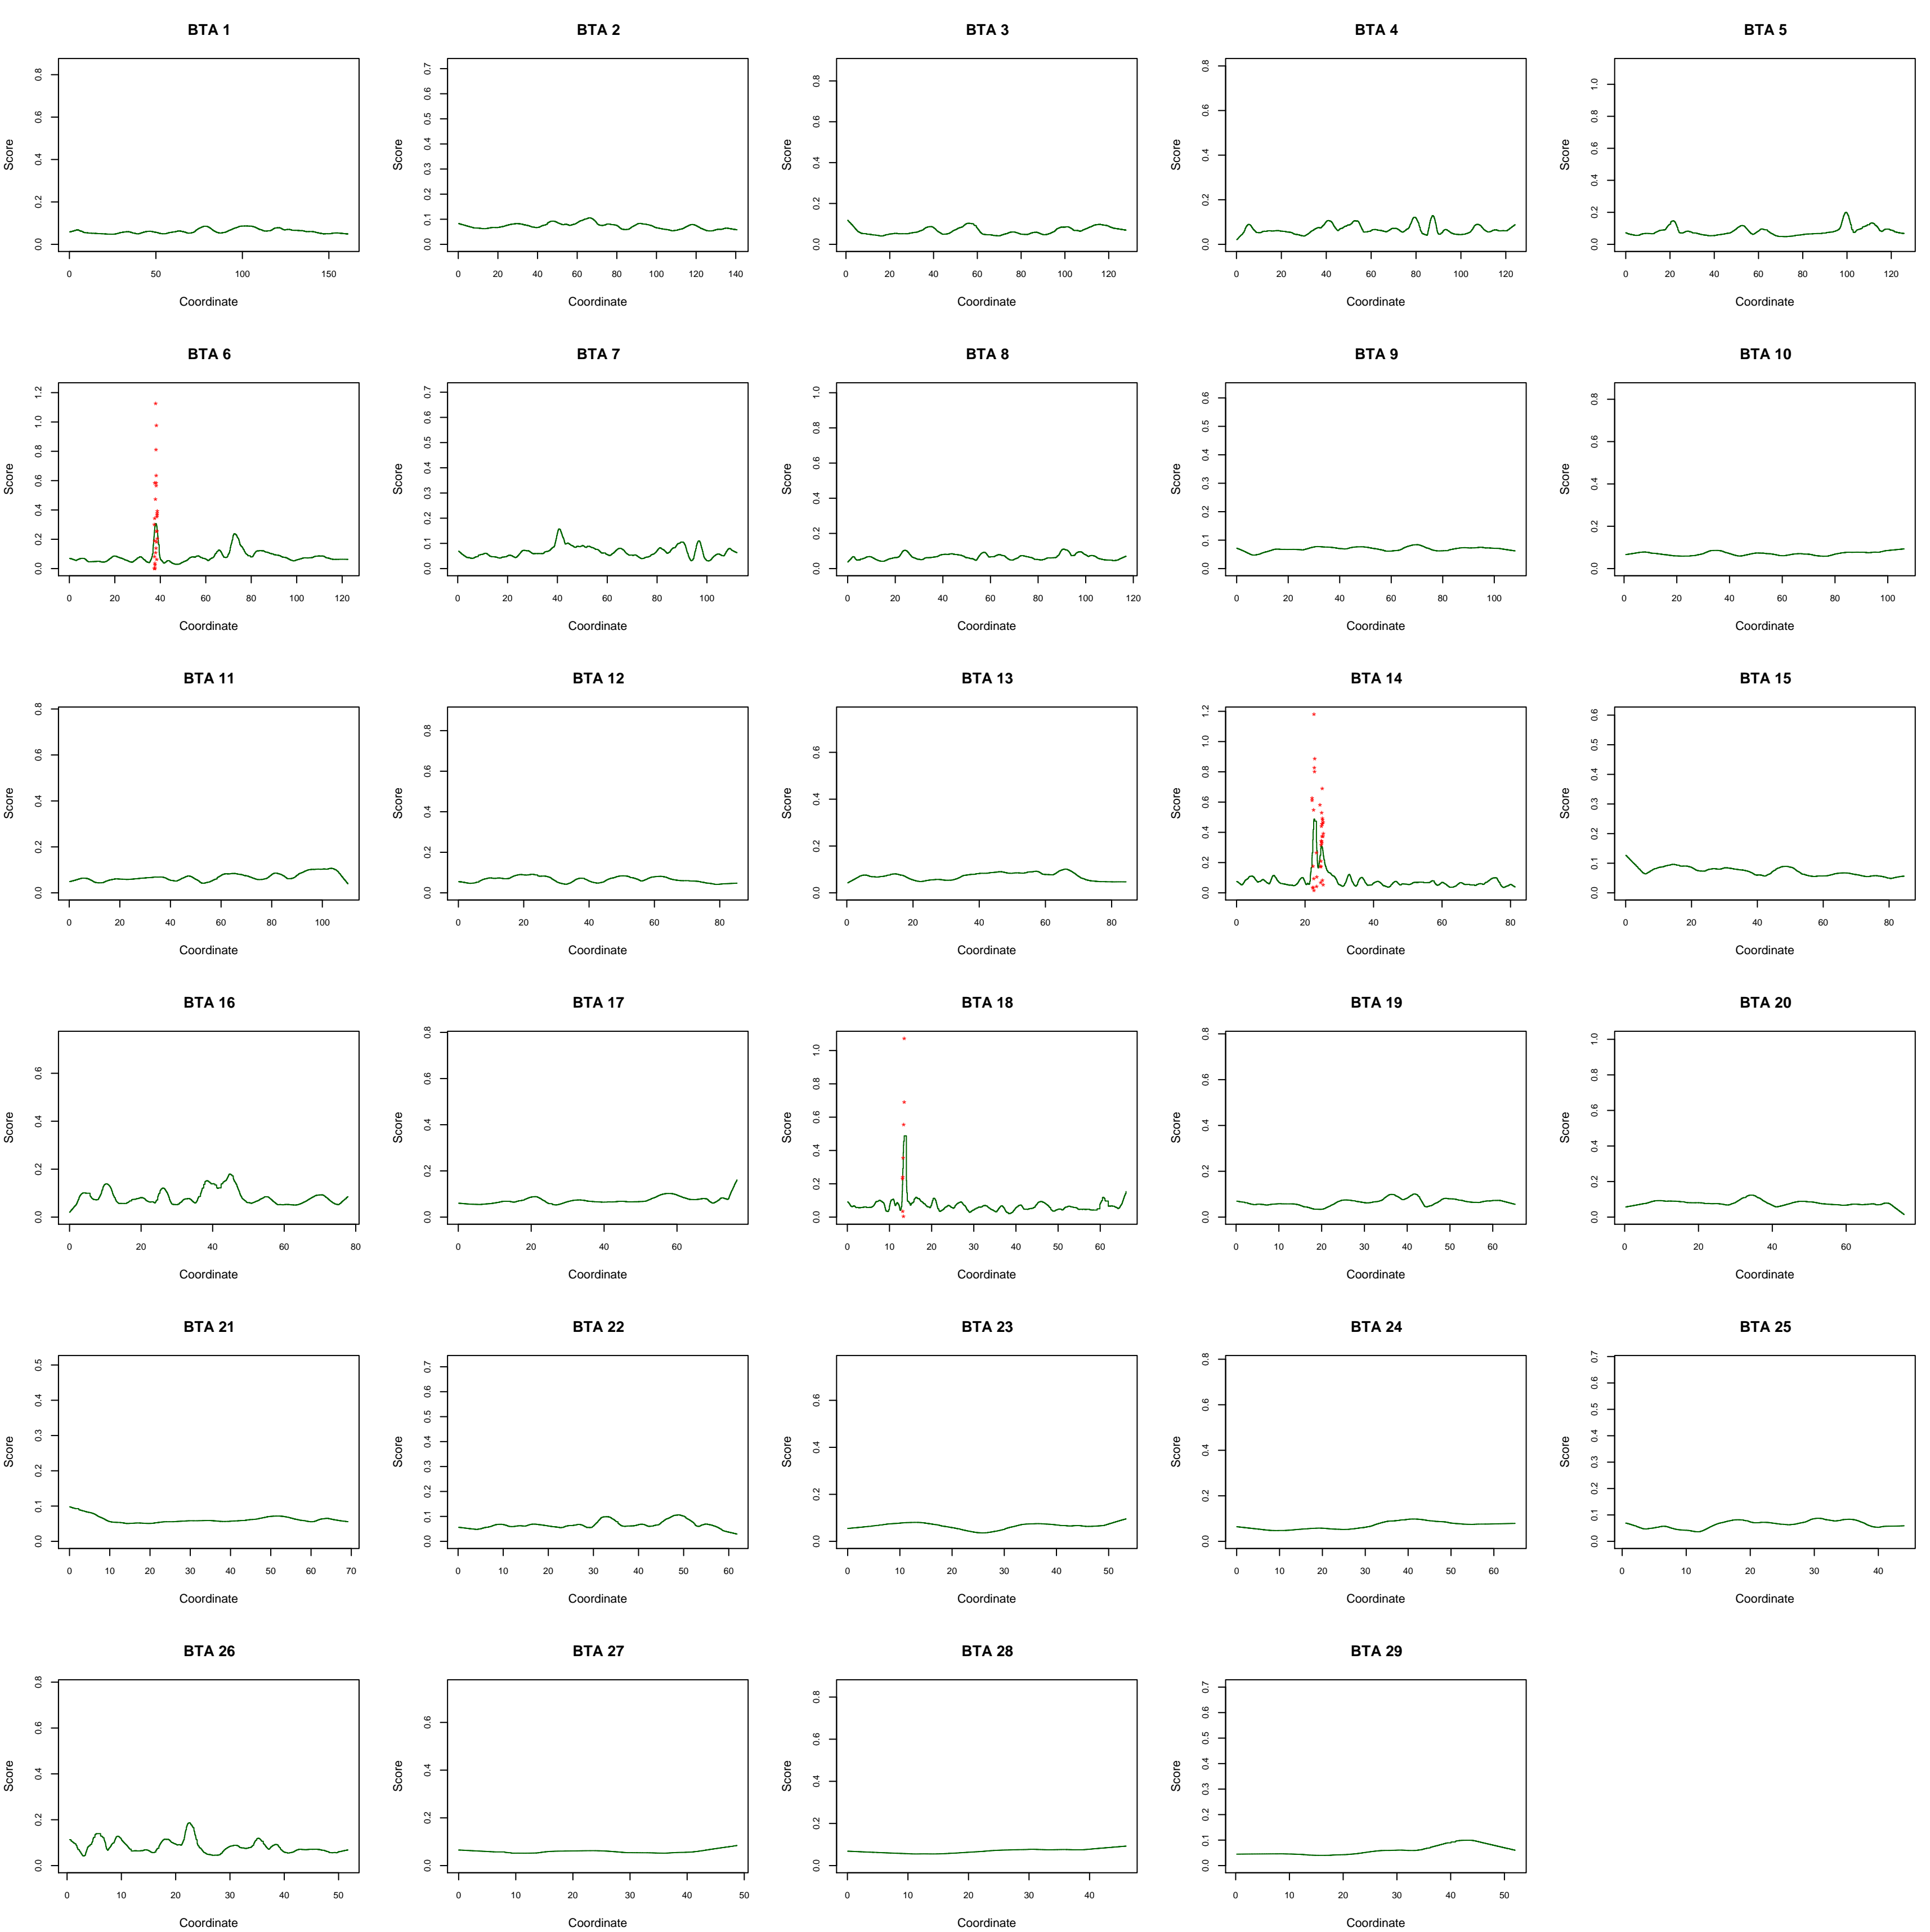

Supplement: S6 (10.1371/journal.pone.0006595.s006) [file journal.pone.0006595.s006]
